# Supplementary material for: Facile synthesis and optical properties of hybrid micro-wires based on Ln(DBM)3·H2O complexes
Source: Royal Society of Chemistry journal article supplement (doi:10.1039/c2ce25536g), 2012-01-01
Supplement: c2ce25536g.pdf [file c2ce25536g.pdf]

## Supporting Information

### **Facile synthesis and optical property of hybrid micro-wires based on Ln(DBM)<sub>3</sub>·H<sub>2</sub>O complexes**

**Wei-Qiang Fan, and Hong-Ye Bai\***

*School of Chemistry & Chemical Engineering, Jiangsu University, Zhenjiang 212013,  
People's Republic of China*

*\*Author to whom correspondence should be addressed. Telephone: +86-511-887901877.*

*E-mail: bhy19841009@yahoo.com.cn*

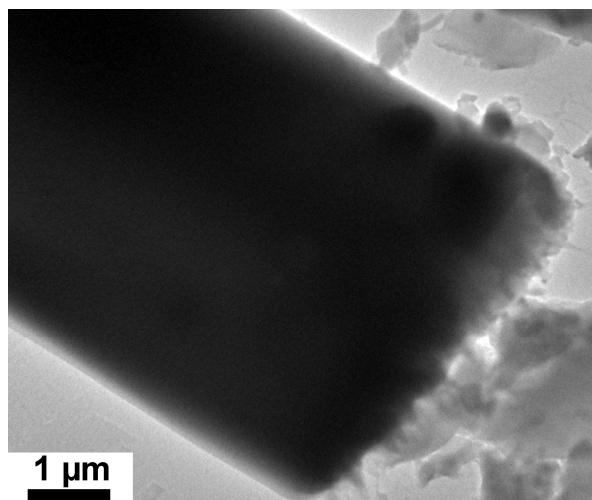

**Fig. S1.** TEM image of EuDBM-MW (0.5 mL water).

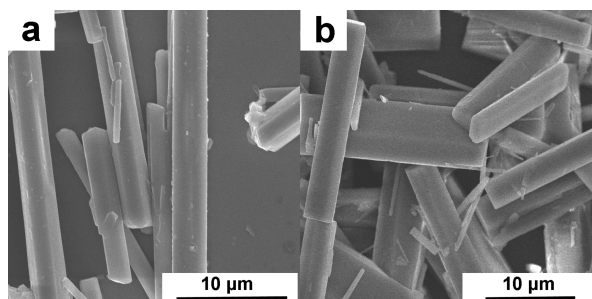

**Fig. S2.** SEM image of TbDBM-MW (a) and SmDBM-MW (b) synthesized by 0.5 mL water.
